# Using OPM-MEG in contrasting magnetic environments

Ryan M. Hill<sup>1,4\*</sup>, Jasen Devasagayam<sup>2</sup>, Niall Holmes<sup>1,4</sup>, Elena Boto<sup>1,4</sup>, Vishal Shah<sup>3</sup>, James Osborne<sup>3</sup>,  
Kristina Safar<sup>2</sup>, Frank Worcester<sup>4</sup>, Christopher Mariani<sup>4</sup>, Eliot Dawson<sup>4</sup>, David Woolger<sup>4</sup>, Richard  
Bowtell<sup>1,4</sup>, Margot J. Taylor<sup>2</sup> and Matthew J. Brookes<sup>1,4</sup>

<sup>1</sup>*Sir Peter Mansfield Imaging Centre, School of Physics and Astronomy, University of Nottingham,  
University Park, Nottingham, NG7 2RD, UK.*

<sup>2</sup>*Diagnostic Imaging, Neuroscience & Mental Health Programme, The Hospital for Sick Children. 555  
University Ave, Toronto, Ontario, Canada*

<sup>3</sup>*QuSpin Inc. 331 South 104<sup>th</sup> Street, Suite 130, Louisville, Colorado, 80027, USA.*

<sup>4</sup>*Cerca Magnetics Limited, Headcorn Road, Staplehurst, Kent, UK.*

## **\*Correspondence to:**

Dr. Ryan Hill,  
Sir Peter Mansfield Imaging Centre,  
School of Physics and Astronomy,  
University of Nottingham,  
University Park,  
Nottingham NG7 2RD,  
United Kingdom  
E-mail: [ryan.hill@nottingham.ac.uk](mailto:ryan.hill@nottingham.ac.uk)

Pages: 25

Words: 8,732

Figures: 6

Running title: *Using OPM-MEG in contrasting magnetic environments*

1 **ABSTRACT:**

2 Magnetoencephalography (MEG) has been revolutionised in recent years by optically pumped  
3 magnetometers (OPMs). “OPM-MEG” offers higher sensitivity, better spatial resolution and lower cost  
4 than conventional instrumentation based on superconducting quantum interference devices  
5 (SQUIDS). Moreover, OPMs offer the possibility of motion robustness and lifespan compliance,  
6 dramatically expanding the range of MEG applications. However, OPM-MEG remains nascent  
7 technology; it places stringent requirements on magnetic shielding, and whilst a number of viable  
8 systems exist, most are custom made and there have been no cross-site investigations showing the  
9 reliability of data. In this paper, we undertake the first cross-site OPM-MEG comparison, using near  
10 identical commercial systems scanning the same participant. The two sites are deliberately  
11 contrasting, with different magnetic environments: a “green field” campus university site with an  
12 OPM-optimised shielded room (low interference) and a city centre hospital site with a “standard”  
13 (non-optimised) MSR (high interference). We show that despite a 25-fold difference in background  
14 field, and a 30-fold difference in low frequency interference, using dynamic field control and software-  
15 based suppression of interference we can generate comparable noise floors at both sites. In human  
16 data recorded during a visuo-motor task and a face processing paradigm, we were able to generate  
17 similar data, with source localisation showing that brain regions could be pinpointed with just ~10 mm  
18 spatial discrepancy and temporal correlations of > 80%. Overall, our study demonstrates that “plug-  
19 and-play” OPM-MEG systems exist and can be sited even in challenging magnetic environments.

20  
21  
22  
23  
24  
25  
26  
27  
28  
29  
30  
31  
32  
33

## 1 **1: INTRODUCTION**

2           Magnetoencephalography (MEG) measures magnetic fields around the head generated by  
3 neural current flow (Cohen, 1972). Mathematical modelling of these fields enables generation of 3D  
4 images, showing the moment-to-moment evolution of electrophysiological brain activity (Baillet,  
5 2017; Hämäläinen et al., 1993). The fields generated by the brain are small ( $\sim 10^{-13}$  T) and to gain  
6 sufficient sensitivity, conventional MEG scanners use superconducting quantum interference devices  
7 (SQUIDs) which must be cryogenically cooled to liquid helium temperatures (Jaklevic et al., 1964). This  
8 places significant limitations on the utility and practicality of the available instrumentation. However,  
9 in recent years, MEG system design has been revolutionised by the availability of small, lightweight,  
10 and robust optically pumped magnetometers (OPMs) (Alem et al., 2014, 2017; Allred et al., 2002;  
11 Borna et al., 2017; Boto et al., 2017; Kominis et al., 2003; Schwindt et al., 2007). OPMs exploit the  
12 quantum properties of alkali atoms to measure local magnetic field with high precision. Sensitivity is  
13 approaching that of a SQUID, and because the sensors do not require cryogenics, they can be placed  
14 closer to the scalp surface, improving sensitivity, spatial resolution, and the uniformity of coverage  
15 (Boto et al., 2016; Hill et al., 2020; Iivanainen et al., 2017). Flexible placement of sensors also allows  
16 for lifespan compliance (Hill et al., 2019), and assuming background fields are appropriately controlled  
17 (Holmes et al., 2018), subjects can move during a scan (Boto et al., 2018). In this way, OPMs are  
18 opening new avenues for MEG research, enabling novel experimental design, new subject cohorts,  
19 and fundamentally better data. This, coupled with lower purchase and running costs, makes OPMs  
20 arguably the most attractive building block for future generations of MEG instrumentation.

21           Despite the promise, significant hurdles remain for OPMs to overtake SQUIDs as the MEG  
22 sensor of choice. Perhaps the biggest barrier relates to the magnetic environment in which systems  
23 are housed. Magnetic fields from the brain are much smaller than the fields that exist naturally in the  
24 environment. For this reason, all MEG systems are operated inside a magnetically shielded room  
25 (MSR), formed from separate layers of high permeability and high conductivity metals (usually mu-  
26 metal and aluminium). These act to reduce low frequency, and high frequency interference fields,  
27 respectively. However, the requirements for shielding for an OPM system are even more stringent  
28 than for SQUID systems; there are three reasons for this: first, OPMs are “zero-field” magnetometers,  
29 meaning that their operation is reliant on the background static magnetic field being close to zero (in  
30 practice this field can be controlled by “on-board” electromagnetic coils, but the background field  
31 must still be  $< 50$  nT). This is distinct from SQUIDs which are relatively unaffected by temporally  
32 stationary magnetic fields or “static” field. In most standard magnetically shielded rooms fields,  
33 although static field is reduced by flux-shunting in mu-metal walls, the presence of the mu-metal itself  
34 leaves a remnant field inside the room, which can be greater than the operational level of an OPM.

1 Second, once in operation, OPMs have a low dynamic range ( $\sim\pm 3.5$  nT). This is because as field is  
2 increased, the linearity of the OPM response to field is lost; a change in background field of  $\sim 3.5$  nT  
3 would be equivalent to a gain error of 5% ([www.quspin.com](http://www.quspin.com)), raising to 10% for a field change of 5 nT.  
4 This means that if the background field drifts over time, or equivalently the OPM array moves with  
5 respect to a temporally static field, the OPM measurement will be compromised, and the data  
6 rendered useless. Consequently, both low frequency drifts and static field must remain at a level of  
7  $< 3.5$  nT (i.e., within 5% gain error) for effective OPM-MEG operation. Third, as in conventional MEG,  
8 magnetic interference from the environment degrades signal-to-noise ratio (SNR). However, most  
9 OPMs are formulated as magnetometers whereas flux transformers used for conventional MEG are  
10 often gradiometers. Magnetometers are more susceptible to magnetic fields from distant sources and  
11 so OPM-MEG is ostensibly more susceptible to environmental interference. In sum, the success of  
12 OPM-MEG is dependent on extremely accurate control of background fields. This provides a significant  
13 challenge, particularly when siting OPM-MEG systems in regions of high magnetic interference (e.g.,  
14 city centre sites).

15 In addition to background field, several other challenges exist; for example, minimisation of  
16 crosstalk between sensors, optimised array design, robust sensor mounting, and accurate  
17 measurement of sensor location and orientation are all requirements for effective OPM-MEG  
18 operation. Multiple solutions have been proposed, and a number of effective OPM-MEG arrays are in  
19 existence. However, the extent to which one can achieve comparable data from multiple sites –  
20 particularly if those sites have different levels of magnetic interference – is unclear. The ultimate  
21 success of OPM-MEG will require such cross-site robustness. This, coupled with ease of system use  
22 and diminished reliance on an extensive (physics-based) support network, is critical if OPM-MEG is to  
23 achieve its full potential and ultimately replace SQUID-based MEG systems.

24 In this paper, we report the first cross-site OPM-MEG comparison. Specifically, we contrast  
25 identical OPM-MEG arrays in very different magnetic environments. The first is a “green field”  
26 (campus university) site with an OPM-optimised magnetically shielded room; the second is a city  
27 centre hospital site with OPM-MEG installed in an existing (non-optimised) magnetically shielded  
28 room. In what follows, we first demonstrate that by a combination of hardware (Holmes et al., 2019)  
29 and software (Tierney et al., 2021) approaches for interference reduction, OPMs can be made to work  
30 with a similar noise floor in both locations. Following this, at both sites, we capture OPM-MEG data  
31 during both a visuo-motor task (well known to generate robust neural oscillatory effects in the beta  
32 and gamma bands), and a visual face processing task (known to generate evoked responses from both  
33 primary and lateral visual areas) in the same participant. Results from both sites are compared  
34 quantitatively, both at the sensor level and following source reconstruction.

1 **2: METHODS:**

2 All data were collected by the authors. All code for analysis was custom written by the authors  
3 using MATLAB.

4 **2.1: Site and system descriptions**

5 Our first OPM-MEG system was housed at the Sir Peter Mansfield Imaging Centre, University  
6 of Nottingham, UK (SPMIC) – a site with inherently low magnetic interference. The system was housed  
7 inside a magnetically shielded room (Magnetic Shields Limited, Kent, UK) comprising 4 layers of mu-  
8 metal and a single layer of copper. Static magnetic field inside the room is minimised by a degaussing  
9 system (Altarev et al., 2015) which allows demagnetisation of the inner mu-metal walls. Background  
10 static field impinging on the array was expected to be  $\sim 2$  nT, with low frequency (i.e.,  $< 1$  Hz) drifts in  
11 magnetic field of  $\sim 0.3$  nT, measured over a ten-minute recording (Rea et al., 2021).

12 Our second site was at the Hospital for Sick Children, Toronto, Canada (SickKids). This is a city  
13 centre hospital site with high inherent magnetic interference generated by nearby infrastructure  
14 including elevators, a metro-line, parking garages and local construction. The SickKids OPM-MEG  
15 system was housed in a MSR (Vacuumschmelze, Hanau, Germany) comprising two layers of mu-metal  
16 and a single layer of aluminium (this MSR was previously used for SQUID-MEG). No degaussing was  
17 available. The static background magnetic field was expected to be  $\sim 30 - 70$  nT ( $\sim 20$  times more than  
18 the SPMIC site) and maximum field drifts measured over a 10-minute period were expected to be 5-  
19 10 nT ( $\sim 30$  times more than SPMIC).

20 At both sites, the OPM-MEG device was equivalent (Cerca Magnetics Limited, Kent, UK; (Hill  
21 et al., 2020)). The array used contained 24 dual-axis zero-field magnetometers manufactured by  
22 QuSpin Inc. (Colorado, USA). Each sensor is a self-contained unit, of dimensions  $12.4 \times 16.6 \times 24.4$   
23  $\text{mm}^3$ , containing a Rb-87 gas vapour within a glass cell, a laser for optical pumping, and on-board  
24 electromagnetic coils for controlling local magnetic field within the cell. Optical pumping polarises the  
25 atomic magnetic moments of the atoms in the gas, inducing a bulk magnetisation. In the presence of  
26 an external field (i.e., the neuromagnetic field) this magnetisation obeys the Bloch equations and can  
27 be exploited to generate a sensitive measure of local field. Two orthogonal components of the local  
28 magnetic field (perpendicular to the pumping laser beam) were measured at each OPM *sensor*, giving  
29 a 48-channel system (note that the OPMs themselves were oriented so field was measured radial to  
30 the head, as well as in one tangential orientation). Each channel had an inherent noise floor  
31 (environmental interference notwithstanding) of  $7 - 10$  fT/sqrt(Hz) and a bandwidth of  $0 - \sim 130$  Hz.  
32 Analogue signals representing the time evolution of measured magnetic fields were fed from the OPM  
33 electronics to a National Instruments digital acquisition system (DAQ), via which they were recorded.

1           Sensors were mounted on the head via a 3D printed helmet (Cerca Magnetics Limited, Kent,  
2           UK – Figure 1a). The helmet is made from a lattice which makes it lightweight (700 g) and enables heat  
3           to escape from the OPMs (which are heated to an external surface temperature of  $\sim \leq 40^\circ\text{C}$ ). The lattice  
4           also enables free flow of air to the subject’s scalp and contains features for cable management. The  
5           helmet contained 64 possible slots for sensor mounting, and the 24 OPMs used were positioned to  
6           optimally cover the left parietal and occipital cortices. Figure 1b shows a digital representation of the  
7           sensor locations with respect to the brain; the arrows represent the sensitive axes along which field  
8           was measured. The coloured surface represents relative sensitivity to dipoles in different brain  
9           regions. The left-hand figure shows the array sensitivity to dipoles oriented in theta (i.e., with a polar  
10          orientation), and the right-hand figure shows the array sensitivity to dipoles oriented in phi (i.e., with  
11          an azimuthal orientation). The colour represents the Frobenius norm of the lead field from each  
12          dipole.

13          Magnetic field surrounding the OPM helmet was controlled using a set of bi-planar coils placed  
14          either side of the participant (Holmes et al., 2018, 2019) (Cerca Magnetics Limited, Kent, UK – Figure  
15          1c). These coils, which are wound on two 1.6-m square planes separated by a 1.5-m gap, generate 3  
16          orthogonal magnetic fields and all 5 independent gradients within a 40-cm cube inside which the  
17          participant’s head is positioned. A reference array, placed behind the participant, measures the  
18          background field/gradient across the helmet and currents are applied to the bi-planar coils to control  
19          this remnant field. At SPMIC, this system of coils was used to remove both the background field and  
20          field drift, while at SickKids, only the dynamic changes were cancelled (described below).  
21          Consequently, there is a larger static background field at the SickKids site, and so the subject was  
22          instructed to it still during acquisition at both sites. Figure 1d shows a schematic diagram of the  
23          complete system. Note in addition to the helmet, coils and MSR, a stimulus delivery system was  
24          available in both labs to deliver visual stimuli to the participant via back projection through a  
25          waveguide in the MSR and onto a screen placed in front of the subject.

26  
27  
28  
29

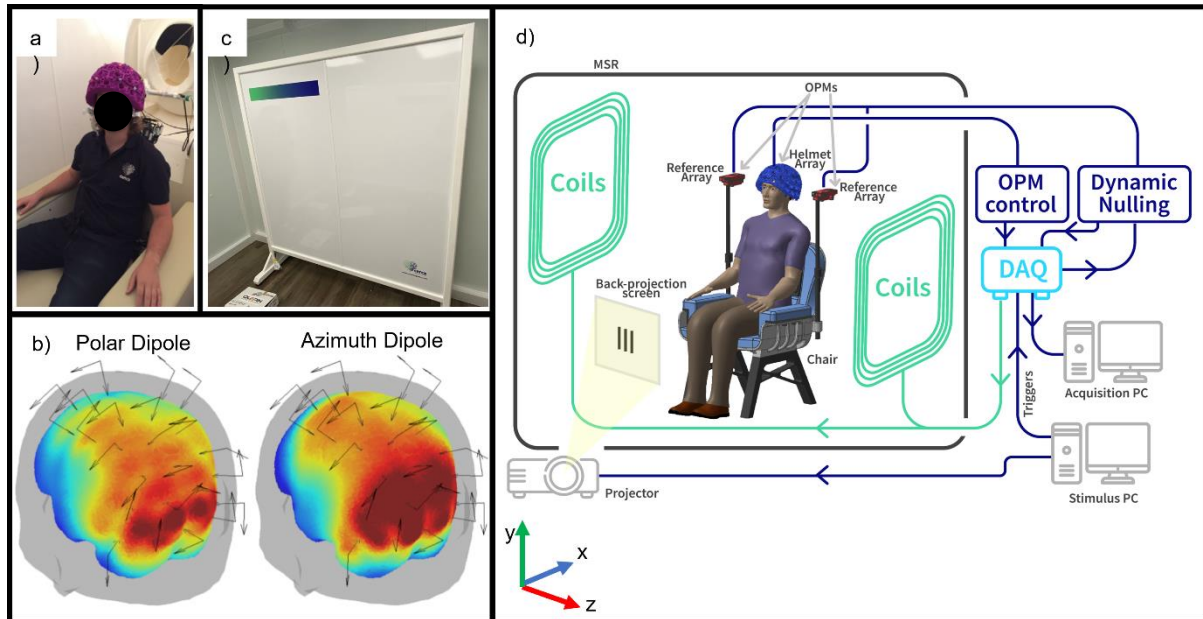

1  
2 **Figure 1: System schematics.** a) A lightweight generic helmet designed to fit ~95% of adults. b) OPM placement  
3 relative to the head. The coloured surface represents sensitivity to a dipole oriented in the polar (left) or azimuth  
4 (right) orientation; we ignore radial dipoles due to the relative insensitivity of MEG to dipoles in this orientation.  
5 c) Biplanar coils placed either side of the subject. d) schematic diagram of the Cerca Magnetics OPM-MEG system  
6 used at the two sites.  
7

## 8 **2.2: Interference rejection methods**

9 As outlined above, the SickKids site was significantly more challenging than the SPMIC site in  
10 terms of background magnetic interference. The expected large drifts in background field regularly  
11 caused the OPMs to exceed their operational range (which we define at a 5% limit on the accuracy of  
12 the OPM gain – which corresponds to a field of  $\pm 3.5$  nT). Further, we expected the interference inside  
13 the room to be significantly worse than that commonly experienced in SPMIC. For this reason, two  
14 separate techniques were used to control interference.

- 15 • *Dynamic nulling:* To keep the sensors within their operational range of  $\pm 3.5$  nT, the bi-planar  
16 coils either side of the participant were operated in a dynamic proportional-integrative (PI)  
17 mode. A complete description of this has been given elsewhere and will not be repeated here  
18 (Holmes et al., 2019; Rea et al., 2021). Briefly, a reference array (Figure 1d) consisting of four  
19 QuSpin OPMs (two placed either side of the subject's head, separated by ~30 cm), measured  
20 the x, y, and z components of the background field at two locations, as well as the field  
21 gradients in the Z direction. The reference magnetometer signals were outputted to a high-  
22 speed (60 Hz) PI controller implemented in LabVIEW, which calculates compensation currents  
23 which are fed back to the coils. These, in turn, generate temporally changing fields that  
24 dynamically compensate <3 Hz changes in the local magnetic field. In this way, we could  
25 control both the background field and the drifts inside the MSR.



1       • *Homogeneous field correction*: To reduce environmental interference after dynamic nulling,  
2       we used Homogeneous Field Correction (Tierney et al., 2021). Briefly, the magnetic  
3       interference from distant sources, observed by an OPM array distributed over a relatively  
4       small volume (i.e., around the head), can be modelled as a spatially homogeneous magnetic  
5       field (i.e., we assume that sources of interference are sufficiently distal that the spatial  
6       variation of magnetic field over the head volume is negligible). This homogenous field is  
7       estimated across the whole array. Then, through knowledge of the sensor orientations, its  
8       manifestation at each sensor can be estimated and subtracted from the data. This acts to  
9       reduce external interference and improve signal-to-noise ratio. The low rank of the model  
10      (i.e., the assumption of field homogeneity) means that there is little risk of removing  
11      substantial neural signal, which has marked spatial variation across the array.

12

### 13 **2.3: Data collection**

14       To test the effects of interference rejection, 5 minutes of empty room data were recorded at  
15      each site, with and without dynamic nulling. The data with dynamic nulling were further processed  
16      using homogeneous field correction. In all three cases (i.e., no correction, dynamic nulling, and  
17      dynamic nulling + homogeneous field correction) the noise floor was assessed quantitatively. The  
18      noise data were processed by calculation of power spectral density using Welch's periodogram  
19      method, to give an accurate representation of the noise floor as a function of frequency.

20       Following empty room recordings, we acquired human MEG data in a single subject. The  
21      participant was a male, aged 26, right-handed. We performed two experimental paradigms, both well  
22      known to produce robust neuromagnetic effects. The first task was a *visuo-motor* paradigm  
23      (Hoogenboom et al., 2006; Iivanainen et al., 2020). Each trial comprised 1 s of baseline measurement  
24      followed by visual stimulation in the form of a centrally presented, inwardly moving, maximum-  
25      contrast circular grating. The grating subtended a visual angle of 7.6 degrees at both sites, and was  
26      displayed for a jittered duration of either 1.6 s, 1.7 s or 1.9 s. Each trial ended with a 3-s baseline  
27      period, and a total of 100 trials was used. During baseline periods, a fixation dot was shown on the  
28      centre of the screen. The participant was instructed to perform abductions of their right index finger  
29      for the duration that the stimulus was on the screen to 'activate' primary motor cortex. We expected  
30      to measure simultaneous fluctuations of beta oscillations in motor cortex, and gamma oscillations in  
31      visual cortex. The second task was a *face processing* paradigm. Here, the participant was asked to  
32      passively view a series of images, each containing a face. In a single trial, a face was displayed on a  
33      screen for 300 ms; this was followed by a rest period of jittered duration ( $1900 \pm 181$  ms) during which  
34      a fixation cross was shown. A total of 100 trials was recorded. This task is well known to generate



1 robust evoked responses both in primary visual cortex (at a latency of ~100 ms) as well as the fusiform  
2 area (at a latency of ~170 ms) (Bentin et al., 1996; Halgren, 2000; Taylor et al., 2001). For both  
3 paradigms the subject was seated and free to move but not encouraged to do so. MEG data were  
4 acquired at a sample rate of 1200 Hz. Each paradigm was independently run 5 times in the same  
5 subject at each of the two locations (SPMIC and SickKids).

6 Following data collection, a 3D optical camera was used to generate a digital model of the  
7 location of the helmet (and thus the sensors) relative to the brain anatomy (Hill et al., 2020). A  
8 digitisation of the participant wearing the helmet was acquired using a Structure Core 3D scanner  
9 (Occipital Inc., San Francisco, CA, USA). This was followed by a second digitisation with the helmet  
10 removed and the participant's hair tied back (to smooth the digitisation of the top of the head). Finally,  
11 a structural MRI of the participant's head was acquired (using a 3T Phillips Ingenia MRI scanner running  
12 an MPRAGE sequence with a spatial resolution of 1 mm). An electronic Computer-Aided Design (CAD)  
13 file of the helmet with the exact locations and orientations of the sensors was aligned to the first  
14 digitisation (of the helmet relative to the face) using 9 identifiable reference points on the helmet. The  
15 first digitisation was then aligned to the second using identifiable facial features (e.g., the nasion, the  
16 alar facial groove either side of the nose, cheek bones) and an iterative closest point (ICP) algorithm  
17 used to fine-tune this alignment (implemented in MeshLab (Cignoni et al., 2008)). The second  
18 digitisation was then aligned (using the same method) to the head/face surface extracted from the  
19 MRI. This procedure allowed a complete co-registration of the sensor locations and orientations to  
20 the anatomical MRI. This would be used later for modelling source locations.

21

## 22 **2.4: Data analysis**

23 For each recording, following homogeneous field correction, data were bandpass filtered  
24 (between 1 and 150 Hz for the visuo-motor paradigm, and 2 and 40 Hz for the face processing  
25 paradigm). Bad trials, defined as those in which the standard deviation of the signal at any one sensor  
26 was greater than 3 times the average standard deviation of the signal at that sensor across all trials,  
27 were removed. Visual inspection of the data confirmed this simple algorithm was successful at  
28 removing trials with excessive noise. Following this, we analysed data first in sensor space, and then  
29 via source modelling:

30

### 31 *Sensor space visualisation*

32 For the *visuo-motor task*, data were further filtered into the beta (13 – 30 Hz) and gamma (35  
33 – 60 Hz) bands. A Hilbert transformation was applied to these filtered data, with the absolute value of  
34 the resulting analytic signal being used to generate an amplitude envelope (Hilbert envelope) showing

1 modulation of oscillatory amplitude in each band. The envelope was averaged across trials and  
2 baseline corrected (the baseline was calculated over the  $-3.4 \text{ s} < t < -2.5 \text{ s}$  time window, relative to  
3 stimulus offset at  $t = 0 \text{ s}$ ). The average envelopes for all 5 experimental runs at each of the two sites  
4 were then averaged and the standard deviation between runs was found to assess repeatability. This  
5 procedure was run for every channel.

6 To assess sensor space field topography of the beta and gamma band signals, we computed  
7 signal to noise ratio (SNR) at each channel. The trial averaged envelope was divided into an “On”  
8 window (i.e., when the stimulation was on;  $-2 \text{ s} < t < -0.5 \text{ s}$ ) and an “Off” window (i.e., when the  
9 stimulus was off;  $0.5 \text{ s} < t < 2 \text{ s}$ ). The SNR in the gamma-band was calculated as the difference in mean  
10 signal between the windows, divided by the standard deviation of the signal in the Off window.  
11 Similarly in the beta-band, the SNR was calculated as the difference in signal means between the two  
12 windows, divided by the standard deviation in the On window (note this was to avoid  
13 misrepresentation of SNR due to the beta rebound; note also, since the beta amplitude was expected  
14 to decrease during stimulation, beta band SNR was expected to be negative). The resulting SNR values  
15 were plotted as a flattened topographical map, across sensor locations, to visualise the sensor-space  
16 topography of the beta and gamma-band responses. Two separate topographies were derived, one  
17 for the radially oriented field, and one for the tangentially oriented field. A time-frequency spectrum  
18 (TFS), alongside averaged envelopes for beta and gamma bands, were also constructed for the  
19 channels with the highest SNR. The TFS was derived by sequentially filtering signals into overlapping  
20 bands, computing the envelope of oscillatory power, averaging over trials, and concatenating in the  
21 frequency dimension.

22 For the face processing task, trials were averaged and baseline corrected (with baseline  
23 calculated in the  $1 \text{ s} < t < 2 \text{ s}$  time window;  $t = 0 \text{ s}$  corresponds to onset of the face stimulus). The trial-  
24 average response for all 5 runs at each site were averaged and the standard deviation found to assess  
25 repeatability. The “best” sensor (i.e., the sensor that showed the largest response) was assessed by  
26 measuring the range of the trial-averaged signal in the  $0.1 \text{ s} < t < 0.2 \text{ s}$  window. A field map was  
27 produced showing the field topography at the time of the largest peak in the evoked response. Again,  
28 field maps were made for radially and tangentially oriented fields.

29

30

### *Source modelling*

31

32

33

34

For both paradigms, source modelling was performed using a vector beamformer. The brain was divided into 4-mm cubic voxels, and at each voxel location, beamformer reconstructed source estimates were made for sources in the polar and azimuth orientations. To generate a visualisation of task induced signal modulation across the brain, a pseudo-t-statistical approach was used to contrast

1 source power in active and control windows. For both tasks, the forward solution was calculated  
2 assuming a dipolar source, and a single-shell uniform volume conductor head model (Nolte, 2003)  
3 created using FieldTrip (Oostenveld et al., 2011).

4 For the visuo-motor task, the active and control windows were  $-1.5 \text{ s} < t < -0.5 \text{ s}$  and  $0.5 \text{ s} < t$   
5  $< 1.5 \text{ s}$  (relative to stimulus offset) respectively. Images showing the spatial signature of modulation  
6 in oscillatory power were generated for both the beta and gamma bands. Beamformer weights were  
7 calculated independently for each band, with the covariance matrices generated using a time window  
8 spanning the entire experiment. The covariance matrices were regularised using the Tikhonov method  
9 with a regularisation parameter equal to 5% of the maximum eigenvalue of the unregularized matrix.  
10 Based on the pseudo-t-statistical images, a peak location showing maximum oscillatory power  
11 modulation was determined, and a signal from this location extracted, again using a beamformer.  
12 Here, data covariance was calculated in the 1–150 Hz band and beamformer weights were used to  
13 generate a ‘virtual sensor’ time course. Note that a single dipole orientation was chosen to maximise  
14 the signal to noise ratio at that location. A time-frequency spectrum was then constructed and  
15 averaged over all 5 runs for each site.

16 For the face processing task, the active and control windows were  $0.075 \text{ s} < t < 0.175 \text{ s}$  and  
17  $1.075 \text{ s} < t < 1.175 \text{ s}$  relative to stimulus onset respectively. Images showing the spatial signature of  
18 modulation in task evoked power were generated. The covariance matrix was generated using data  
19 filtered in the 2 – 40 Hz and a time window spanning the entire experiment. Again 5% regularisation  
20 was used. Two dipole locations were selected – one in the primary visual cortex (MNI coordinates: (-  
21 8, -100, 7) mm), and the other at the peak of the average T-stat for each site (in the left fusiform gyrus  
22 for both; MNI coordinates: (-45, -60, -10) mm) – and a signal in each location was reconstructed using  
23 the beamformer. Evoked responses were generated by averaging over trials. These responses were  
24 then averaged across all 5 runs for each of the two experimental sites, and a standard deviation  
25 calculated to assess robustness.

26  
27  
28  
29  
30  
31  
32  
33  
34

## 1 **3: RESULTS**

### 2 **3.1 Rejection of interference**

3            Figures 2a and 2b (left panels) show time-series data for a representative sensor placed in an  
4 empty helmet at the central region of the bi-planar coils, recorded over 5 minutes. The two black  
5 dashed lines at  $\pm 3.5$  nT represent a field change corresponding to a 5% change in sensor gain (we  
6 would deem sensors inoperable at fields outside of this range). The right-hand panels of Figures 2a  
7 and 2b show the mean power spectral density over all 24 sensors placed in the helmet, with the inset  
8 axes showing data at frequencies  $< 5$  Hz. Here, the black dashed line is at  $15 \text{ fT}/\sqrt{\text{Hz}}$ ; in the absence  
9 of external interference (i.e., considering only noise inherent to the sensors) we would expect the  
10 power spectral density to be below this line at frequencies above  $\sim 5$  Hz (most OPMs have inherent  
11 noise of between  $7 - 10 \text{ fT}/\sqrt{\text{Hz}}$ ). For this reason, we deem  $15 \text{ fT}/\sqrt{\text{Hz}}$  as the 'target' baseline  
12 noise level (at which inherent sensor noise dominates). In the plots, the blue lines show raw data (i.e.,  
13 with no dynamic nulling or mean field correction); the red lines show data with dynamic nulling, and  
14 the yellow lines show data with both dynamic nulling and homogenous field correction (HFC) applied.  
15 Figure 2a shows the case for SickKids; Figure 2b shows the case for SPMIC.

16            At the SickKids site, when no nulling is applied, the background field drifts cause the sensor to  
17 regularly exceed its operational range. When dynamic nulling is applied, the sensor is kept well within  
18 its operational range, but the noise floor above 3 Hz is raised. HFC removes the majority of the  
19 interference, bringing the noise floor close to  $15 \text{ fT}/\sqrt{\text{Hz}}$ . At the SPMIC site, even with no nulling  
20 the sensor is well within its operational range. Dynamic nulling reduces the amplitude of the low  
21 frequency interference but again increases interference above 3 Hz. HFC again corrects the noise floor  
22 above 3 Hz to a level similar to the no nulling case.

23            These example results are formalised in Figure 2c. Here, the left panel shows the mean  
24 absolute range (i.e., the absolute value of the maximum change from zero) for all 48 channels in the  
25 SickKids array. The black crosses represent the individual values for each channel. In the no nulling  
26 case, the average range is in excess of 5 nT, which corresponds to a gain change in excess of  $>10\%$ ,  
27 and all but one channel exceed their operational range at some point during the 5-minute recording.  
28 However, when dynamic nulling is applied, all channels remain within their operational range, and  
29 HFC reduces this further. The right panel shows the equivalent data for the SPMIC site (note the  
30 difference in the y-axis scale).

31

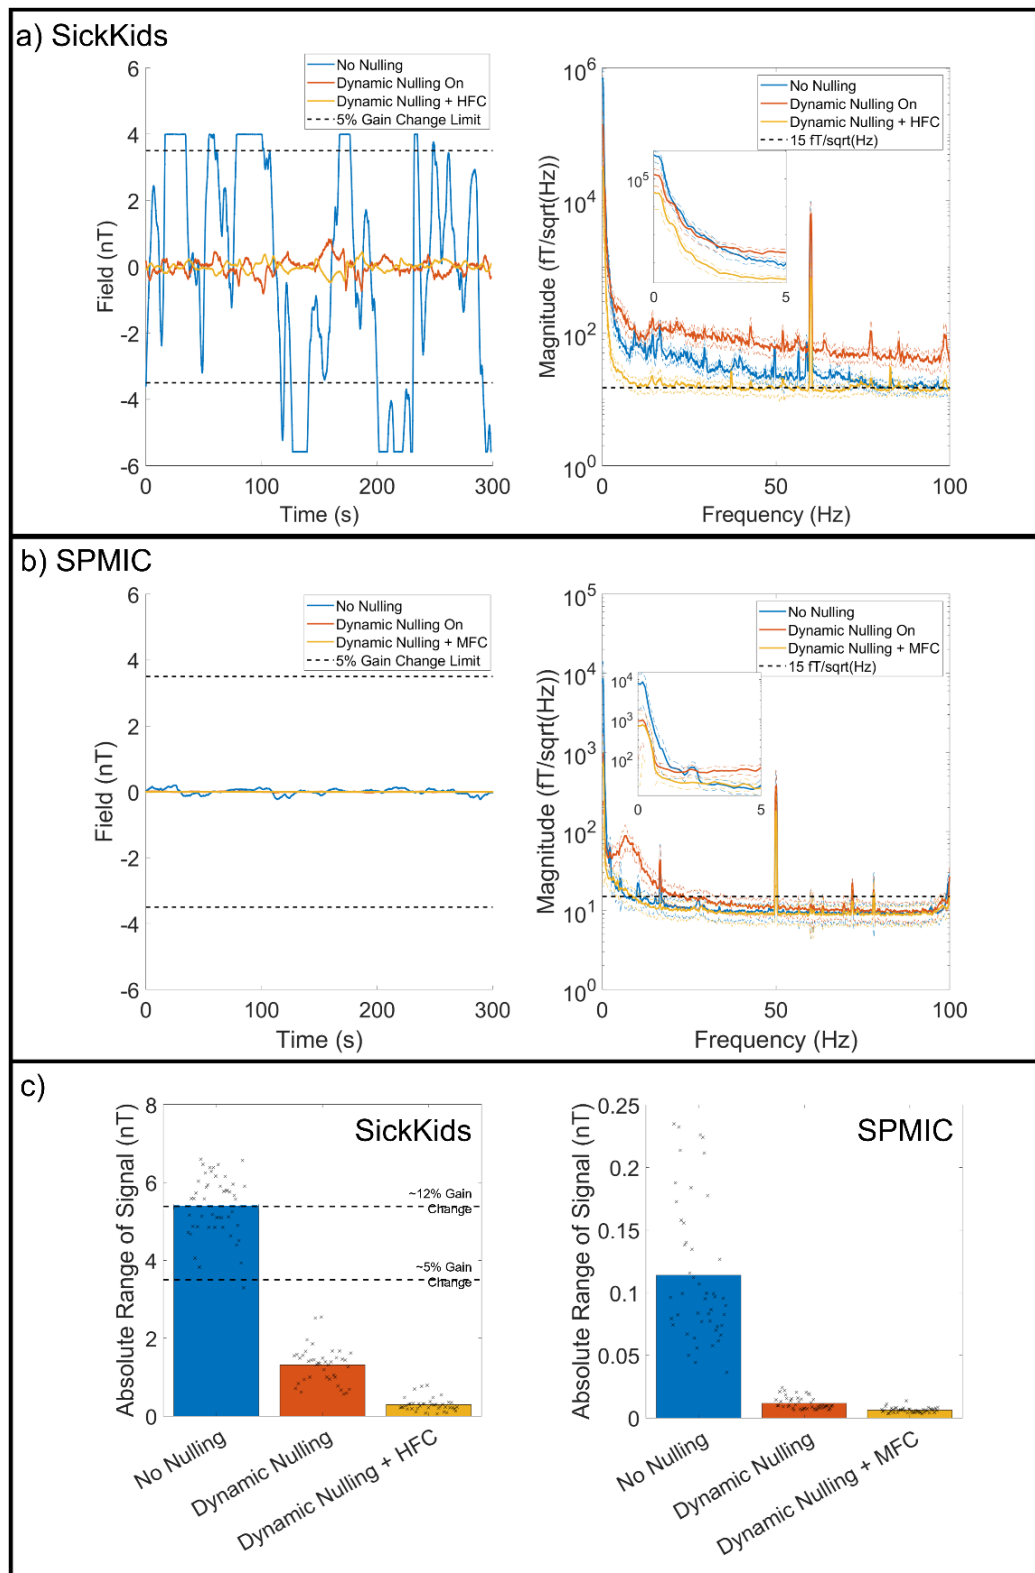

1

2 **Figure 2: Interference rejection.** a) SickKids empty room recording. Raw data for a single representative sensor  
3 are shown on the left for the No Nulling Recording (blue), Dynamic Nulling Recording (red), and the Dynamic  
4 Nulling Recording with Homogenous Field Correction (HFC) applied (yellow). A dashed line at 3.5 nT represents a  
5 gain change in the signal of 5%; if field increases above this line the sensor is non-operational. On the right, the  
6 power spectral density (PSD) of each recording is shown, with the inset showing the differences at low (<5 Hz)  
7 frequencies. b) Identical to a) for the SPMIC site. c) Left: the average absolute range (i.e., the largest change from  
8 zero) for each recording for the SickKids site. The black dashed lines show the 5% and 12% gain change limits. In  
9 both plots, the black crosses show the values for each channel. Right: The same plot for the SPMIC site.

1            These data show clearly that dynamic nulling can be used to maintain sensor operation, even  
 2            at a site where there are large changes in background field. However, this comes at the cost of  
 3            increases in higher frequency interference which is generated by noise in the coil current drivers.  
 4            Consequently, with only dynamic nulling, the background noise is above the 15 fT/sqrt(Hz) target.  
 5            However, HFC corrects this, as well as suppressing other background interference. On average in the  
 6            10-Hz to 40-Hz frequency range, following both dynamic nulling and HFC, the measured noise floor  
 7            across the array (mean  $\pm$  standard deviation) was  $16.4 \pm 2.8$  fT/sqrt(Hz), and  $10.4 \pm 2.1$  fT/sqrt(Hz), for  
 8            the SickKids and SPMIC sites respectively.

9

### 10 **3.2 Data rejection:**

11            In the human experiments, we rejected trials with high levels of interference. These data, for  
 12            both sites, are shown in Table 1. At the SickKids site, on average 22% of the trials for the visuo-motor  
 13            task had to be discarded (~2 minutes of data) due to unpredictable interference; likewise, 20% of the  
 14            trials were discarded for the face processing task. At the Nottingham site, these values were reduced  
 15            significantly for the face processing task (5.6% of trials), while only slightly for the visuo-motor task  
 16            (16% of trials). These data will be further discussed in Section 4.

| <b>VISUO-MOTOR TASK</b>     | <b>SPMIC<br/>NUMBER OF BAD TRIALS<br/>(OUT OF 100)</b> | <b>SICKKIDS<br/>NUMBER OF BAD TRIALS<br/>(OUT OF 100)</b> |
|-----------------------------|--------------------------------------------------------|-----------------------------------------------------------|
| <b>RUN 1</b>                | 12                                                     | 10                                                        |
| <b>RUN 2</b>                | 13                                                     | 12                                                        |
| <b>RUN 3</b>                | 26                                                     | 12                                                        |
| <b>RUN 4</b>                | 13                                                     | 28                                                        |
| <b>RUN 5</b>                | 18                                                     | 50                                                        |
| <b>FACE PROCESSING TASK</b> |                                                        |                                                           |
| <b>RUN 1</b>                | 2                                                      | 4                                                         |
| <b>RUN 2</b>                | 12                                                     | 29                                                        |
| <b>RUN 3</b>                | 3                                                      | 27                                                        |
| <b>RUN 4</b>                | 4                                                      | 22                                                        |
| <b>RUN 5</b>                | 7                                                      | 20                                                        |

17 **Table 1: Trials rejected.** The number of trials (out of 100) rejected for each run at each site.

18

### 19 **3.3 Visuo-motor task results**

20            Figure 3 shows sensor-space beta- and gamma-band signals recorded during the visuo-motor  
 21            task. The spatial topographies show average (across all 5 runs) SNR for each sensor, for each frequency  
 22            band and experimental site. The line plots show the trial-averaged oscillatory envelopes from the  
 23            sensor with the largest SNR, averaged over the 5 runs with the standard deviation represented by the  
 24            shaded areas. A time-frequency spectrum for the largest SNR sensor in each case is also shown.



1 In the occipital sensors we observe gamma synchronisation during visual stimulation (in the -  
2 2 s < t < 0 s window). Meanwhile, in the sensors over the motor cortex, we observe the characteristic  
3 beta-band desynchronisation (during the -2 s < t < 0 s window), followed by the post-movement beta  
4 rebound (during the 0 s < t < 2 s window). While the gamma signal is a similar amplitude for both sites,  
5 the beta rebound amplitude is slightly higher for the SickKids site.  
6

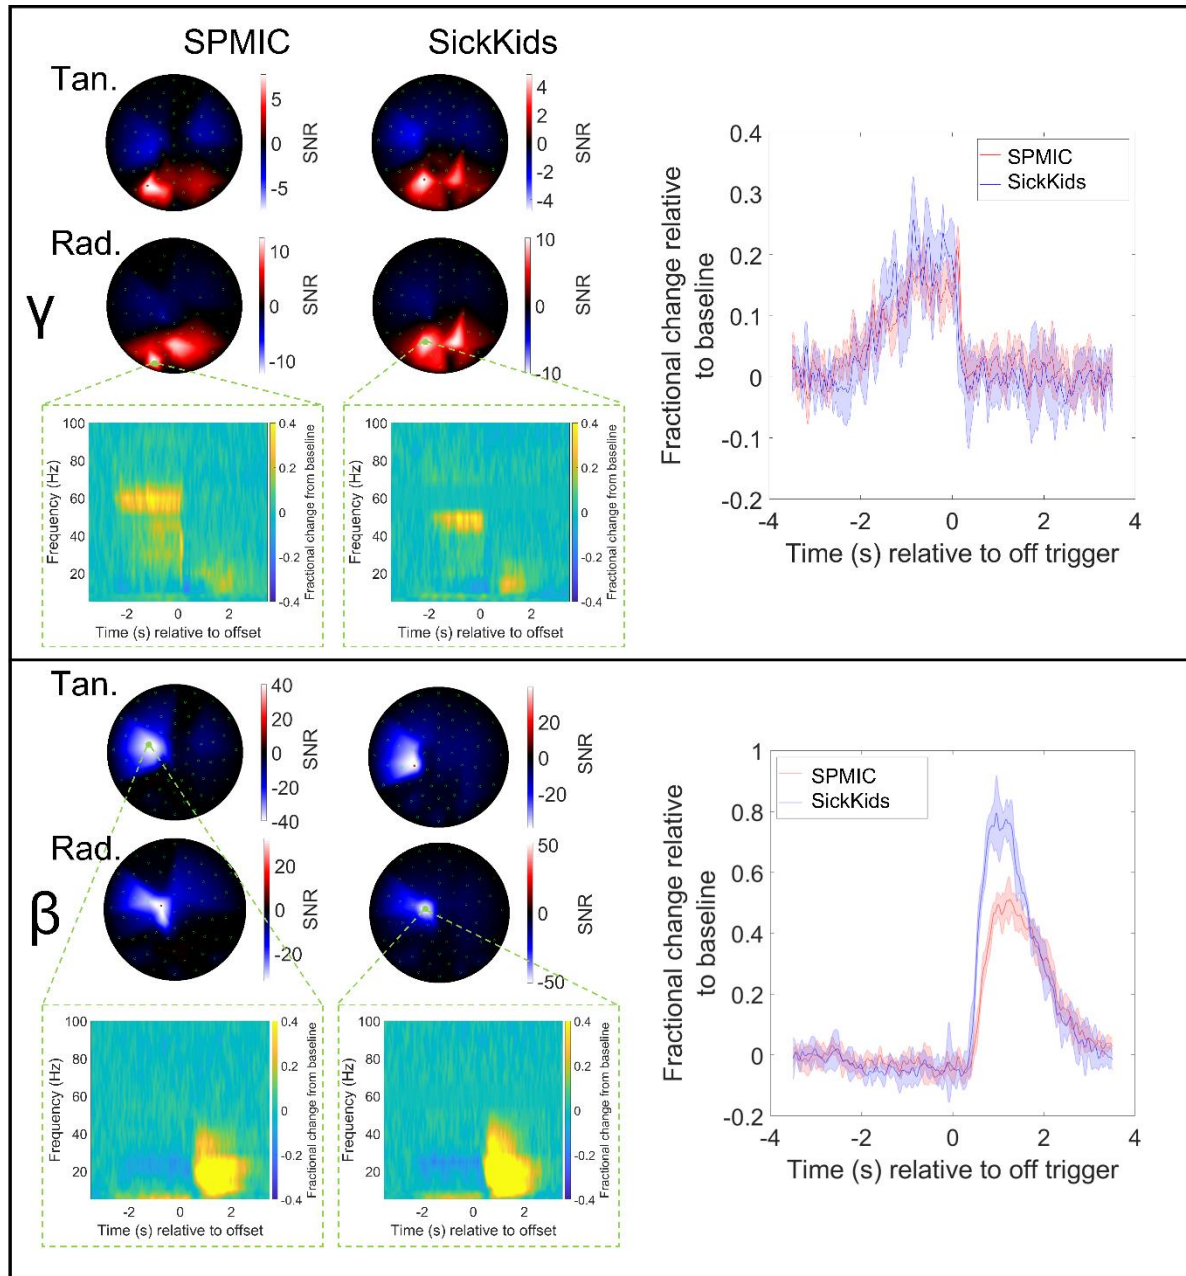

7  
8 **Figure 3: Visuo-motor results (sensor-level).** Upper panel: Sensor-level results for the gamma-band (35 – 60 Hz).  
9 Spatial topography of the signal-to-noise ratios (SNR) for each sensor averaged across all 5 runs is shown for  
10 each site (tangential-axis measurements on top, radial-axis on bottom). On the right, the trial-averaged envelope  
11 for the sensor with the highest SNR in the beta band is plotted, with shaded error bars showing the standard  
12 deviation across all 5 runs. Results for each site are overlaid, SPMIC in red and SickKids in blue. Time-frequency  
13 spectrograms are also shown for the sensor with the highest SNR. Lower panel: Same as the upper panel but in  
14 the beta-band (13 – 30 Hz).



1           Figure 4 shows the results of source reconstruction for the visuo-motor data. The spatial  
2 signature of the change in beta and gamma power can be seen for both systems, as well as time-  
3 frequency spectrograms (averaged over runs) and the trial-averaged oscillatory envelopes for the peak  
4 location of each band. As expected, the beta modulation maps to the contralateral primary  
5 sensorimotor cortex, while the gamma modulation maps to primary visual cortex. The Euclidean  
6 distance between the SickKids and SPMIC average spatial signature peak locations were 12 mm for  
7 the beta peak, and 23 mm for the gamma peak. The source reconstructed time-frequency  
8 spectrograms and trial-averaged oscillatory envelopes also show the same characteristic patterns as  
9 the sensor-level data with the movement-related beta decrease and post movement rebound, and  
10 visual induced gamma amplitude increase both clearly visible; specifically, the temporal correlations  
11 between the trial averaged oscillatory envelopes were  $0.95 \pm 0.01$  in the beta band and  $0.81 \pm 0.05$  in  
12 the gamma band. The beta-band responses have SNR values of 47 and 48 for SPMIC and SickKids  
13 respectively; the gamma-band values are 16 and 8.  
14

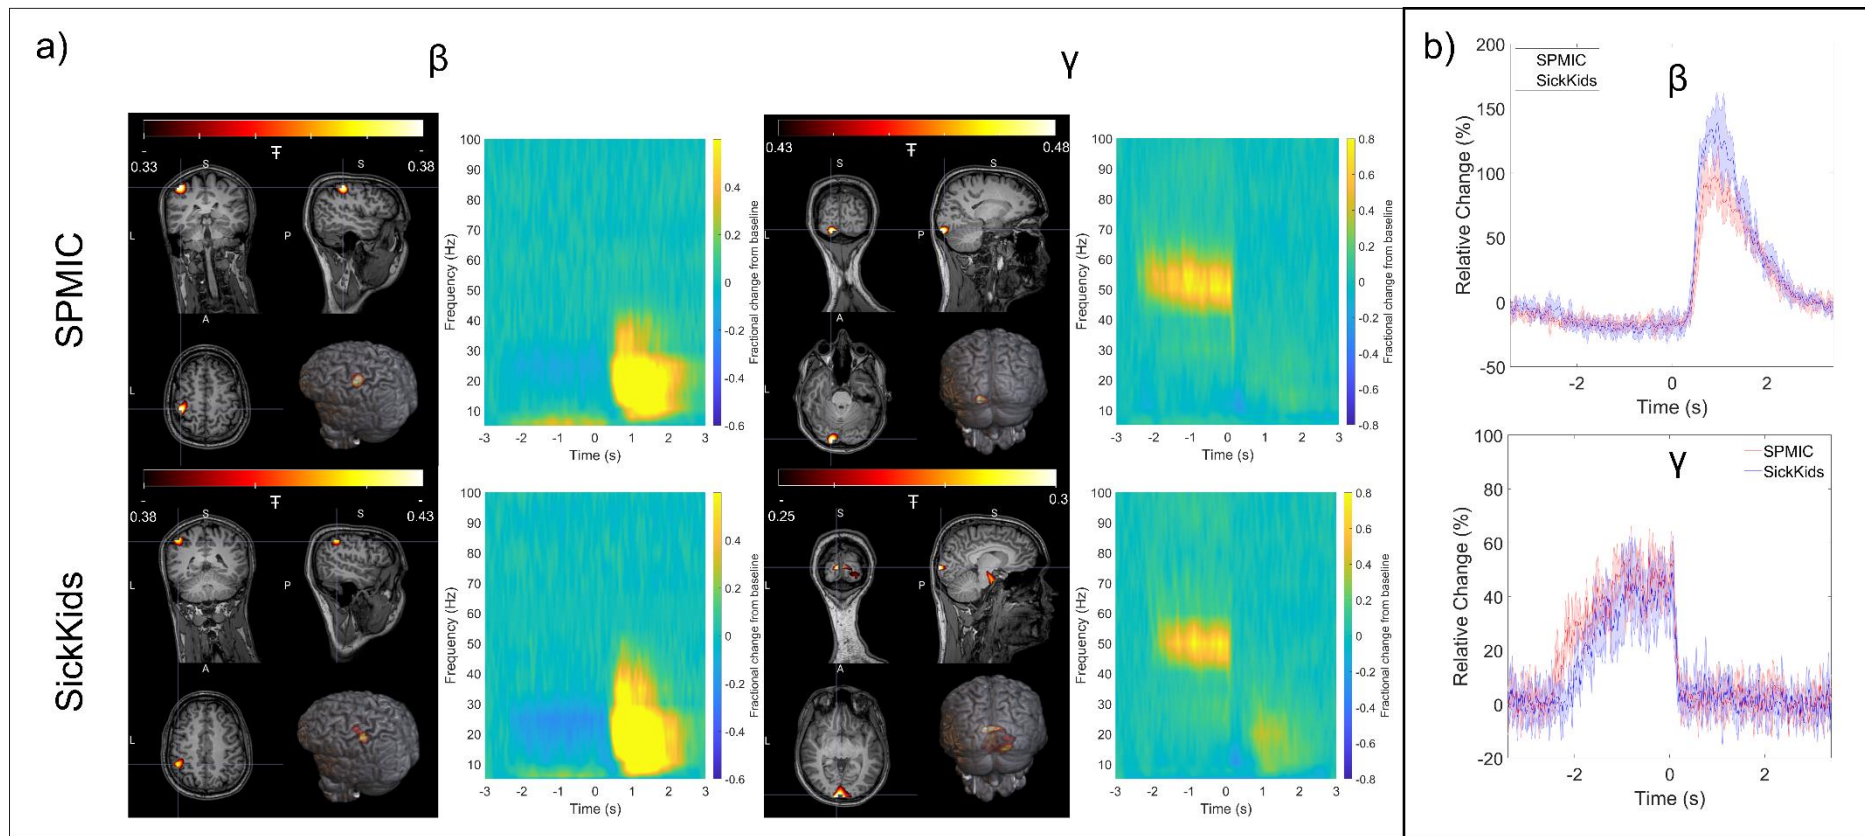

1

2 **Figure 4: Visuo-motor results (source-level).** a) The left and right columns show beta- and gamma-band results respectively. The upper and lower rows show data from the  
 3 SPMIC and SickKids sites. In each case, a pseudo-t-statistical image, showing the spatial signature of oscillatory modulation (averaged over all 5 runs) is shown on the left,  
 4 and a time-frequency spectrum for the locations of peak modulation on the right. b) The trial averaged oscillatory envelopes for the beta- (top) and gamma-band (bottom)  
 5 with SPMIC shown in red, and SickKids in blue with shaded error bars showing the standard deviation across all 5 runs.

### 1 3.4: Face processing task results

2 Figure 5 shows a comparison of the evoked responses measured at the sensor level at both  
3 sites during the face processing task. The left-hand figure shows the evoked response from the single  
4 “best” sensor; SPMIC data shown in red and SickKids data shown in blue. In both cases, data are  
5 averaged across all five runs with the shaded area showing the standard deviation across runs. Both  
6 sites show similar responses with a peak in field occurring at ~100 ms post stimulation. The field maps  
7 on the right of the Figure show the spatial topography of magnetic field across sensors. The two maps  
8 show a similar field distribution with a clear dipolar pattern across the occipital sensors in the Z (radial)  
9 components. Note the variation between sites is likely because the helmet was positioned differently  
10 on the participant’s head.

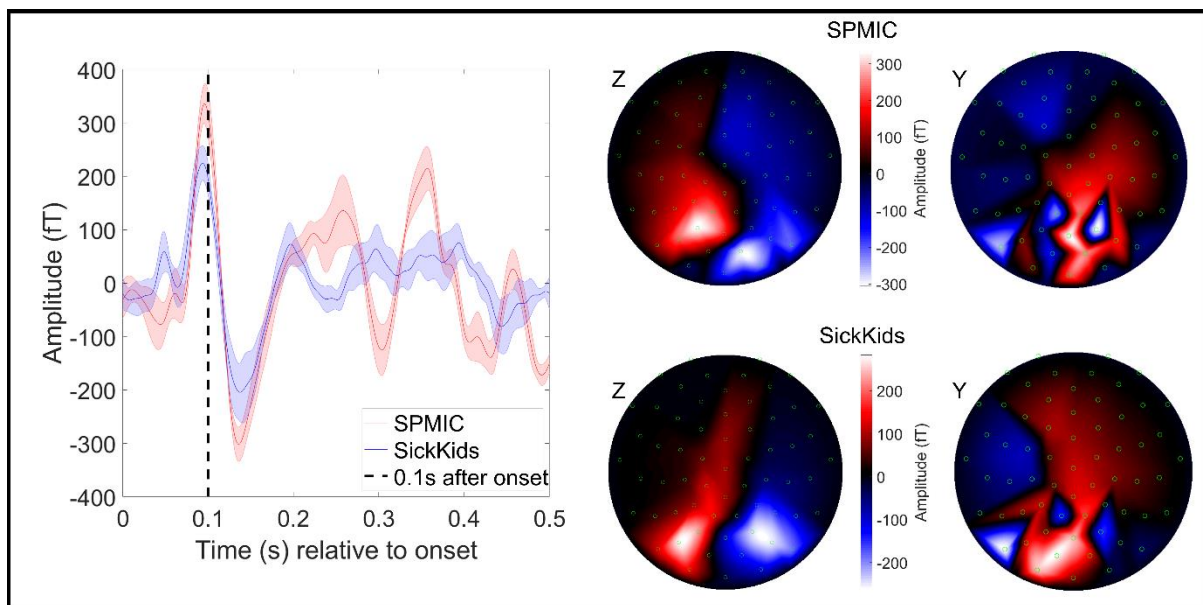

11  
12 **Figure 5: Face processing results (sensor-level).** The trial-averaged response in the best sensor for all 5 runs at  
13 each site averaged over runs, with the standard deviation across runs shown by the shaded error bars. The best  
14 sensor was determined by the range of the trial-averaged signal for each sensor in the  $0.075\text{ s} < t < 0.175\text{ s}$   
15 window. The field maps on the right show the field distribution at the peak of the average evoked response at  
16 0.1 s (Z-axis (radial) measurements on the left, Y-axis (tangential) on the right).

17  
18 Finally, Figure 6 shows the source localisation and reconstruction of the evoked response. The  
19 peak in the pseudo-t-statistical image is found at the border of the left temporal and occipital lobes  
20 for both sites (MNI coordinates: (-46, -68, -11) mm and (-46, -64, -8) mm for SPMIC and SickKids  
21 respectively). Two virtual sensor traces are also shown, one extracted from primary visual cortex, and  
22 the second from the left fusiform areas for each site (represented as red and blue lines respectively).  
23 Inset, the primary visual response is magnified to show the characteristic 75 ms and 145 ms latency  
24 peaks. Data from both sites are highly comparable. Spatially, the peak locations in the temporal lobe  
25 are separated by 5.7 mm. In terms of temporal morphologies, the two sites are also very similar with  
26 near identical latencies for the peak responses, and comparable amplitudes at both virtual sensor

1 locations. Quantitatively, the temporal correlations between the trial averaged evoked responses  
2 (measured in the 0 s to 0.3 s window) were  $0.70 \pm 0.12$  in the primary visual area and  $0.88 \pm 0.04$  in  
3 the fusiform area. These again show the strong similarity of measured responses across the two sites.

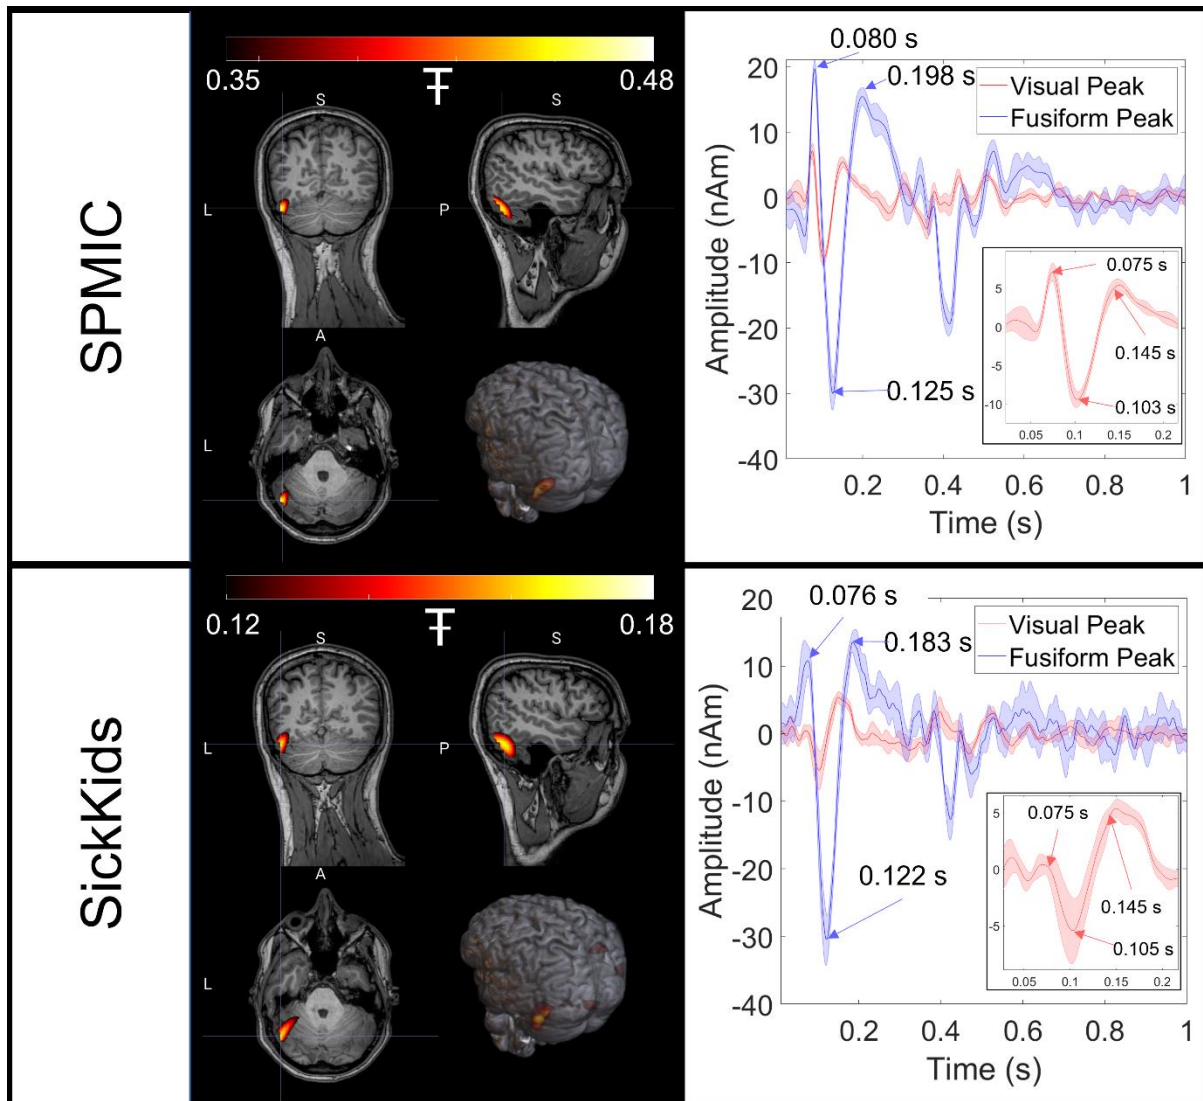

4  
5 **Figure 6: Face processing results (source-level).** For each site, the spatial signature of evoked power in the 0.075  
6  $s < t < 0.175 s$  window is shown contrasted against power in the 1.075  $s < t < 1.175 s$  window. On the right, two  
7 trial-averaged evoked responses are displayed with the shaded error bars showing the standard deviation across  
8 runs. The red line corresponds to a time-course reconstructed in the primary visual area, and the blue line to the  
9 left fusiform. Note the differences between regions, but also the similarities across sites. Inset, the primary visual  
10 response is magnified.  
11  
12  
13  
14  
15  
16

## 1 **4: DISCUSSION**

2 In this paper, we have shown the first cross-site OPM-MEG comparison. Two near identical  
3 systems were constructed in different magnetic environments, with a  $\sim 25$ -fold difference in static  
4 background field and a  $\sim 30$ -fold difference in low frequency drift. We showed that, through a  
5 combination of background field control (dynamic nulling) and post-processing techniques  
6 (homogeneous field correction), OPMs not only remain operational in the non-optimised magnetic  
7 environment, but also demonstrate a noise floor of  $\sim 16$  fT/sqrt(Hz) which is only slightly higher than  
8 our low noise environment ( $\sim 10$  fT/sqrt(Hz)). In our human experiments, with the same participant  
9 scanned multiple times, we were able to record robust, high-quality MEG data in both environments.  
10 Specifically, we were able to reconstruct both beta- and gamma-band modulation in our visuo-motor  
11 task, and evoked responses in our face processing paradigm. On average, the spatial discrepancy  
12 between localisations at the two sites was of order 10 mm. The temporal correlation between the  
13 sites was  $0.82 \pm 0.06$  (collapsed across runs and tasks). Thus, both sites showed highly comparable  
14 signals, demonstrating that OPM-MEG systems can work reliably and similar to a low-noise  
15 environment, even in busy city centre sites.

16 Low frequency drift in background field is a significant issue for OPMs, since a shift away from  
17 zero has a marked effect on sensor gain. Specifically, a change in field of 3.5 nT causes a change in gain  
18 of  $\sim 5\%$ ; the levels of drift observed in the MSR at the SickKids site were of order 10 nT, which would  
19 correspond to  $\sim 30\%$  gain change. Without dynamic nulling and field correction, this would be  
20 sufficient to invalidate the models used for source reconstruction and render the recorded data an  
21 inaccurate representation of brain activity. Previous work has shown that dynamic nulling is effective  
22 at cancelling low frequency field drifts (Holmes et al., 2019), although existing demonstrations have  
23 been based on lower amplitude artefacts. Here results in Figure 2 show that low frequency drifts up  
24 to 10 nT could be controlled successfully, allowing the sensors to remain within their operational  
25 range, measuring high fidelity MEG data. Dynamic nulling is therefore critical to enable successful  
26 OPM-MEG operation. However, the precise methodology used has some constraints. First, the  
27 reference array used included only 4 sensors at both sites; whilst this enables accurate  
28 characterisation of background field close to the helmet, field gradients can only be calculated in a  
29 single orientation (Z). Second, the power spectra in Figure 2 show that dynamic nulling impacts on  
30 interference at higher frequencies. This is due to dynamic range: we have to generate fields of order  
31 10 nT, and the dynamic range of the current drivers means a least significant bit size of  $\sim 1$  pT.  
32 Consequently even the smallest changes in current through the coils generate a shift in background  
33 field which is large relative to the target noise floor (15 fT/sqrt(Hz)). Thus, any noise is transmitted to  
34 the OPMs around the head by the coils themselves, raising the noise floor at all frequencies. Whilst



1 our dynamic nulling scheme worked well, improved reference array design and lower noise current  
2 drivers would likely further improve recordings.

3         Although interference was high following dynamic nulling, it was adequately controlled via  
4 the application of homogeneous field correction, which was able to reduce the noise floor at high  
5 frequencies (10 Hz – 40 Hz) from  $\sim 100$  fT/sqrt(Hz) to  $\sim 16$  fT/sqrt(Hz). HFC is an attractive solution to  
6 removal of interference in an OPM array; it is simple to implement, and the low rank of the model  
7 (i.e., the assumption of homogeneity across the head sensors) means a low likelihood of removing  
8 neural signal. This is especially important in OPM arrays as they typically contain fewer sensors than a  
9 SQUID array, hence the likelihood that any spatial basis set will explain the neural signal by chance is  
10 increased. However, HFC is extremely dependent on knowledge of the relative orientations of each  
11 sensor. For rigid additively manufactured helmets as used in the current study, where the relative  
12 sensor locations and orientations are precisely known (from the electronic CAD file used to define the  
13 print), this issue is reduced. However, if flexible (EEG-like) caps were used (e.g., as in Hill et al., 2020)  
14 the relative sensor locations and orientations are more challenging to measure and could even change  
15 throughout an experiment. It is therefore likely that the utility of HFC would decline dramatically in  
16 this case.

17         Despite limitations of both the interference rejection methods used, we showed that systems  
18 at both sites produced high fidelity data. Spatially, we observed excellent agreement in source  
19 localisation for both the beta band effects in sensorimotor cortex ( $\sim 10$  mm), and the evoked response  
20 in left fusiform area ( $\sim 5$  mm). The spatial differences across sites for the gamma band effects in visual  
21 cortex were larger ( $\sim 28$  mm). There are likely several reasons for this. First the stimulus was a centrally  
22 presented circular grating, which means the spatial extent of the cortical regions activated will be  
23 large. In addition, depending on precisely how the screen was set up, and how the subject viewed it,  
24 the retinotopic organisation of the visual cortex is likely to result in a spatial shift of the peak in the  
25 response. Finally, gamma is well known to be low amplitude and consequently low signal to noise  
26 response. These effects combined will likely cause the spatial difference to be higher than for the  
27 motor response (which will be mapped to the motortopic representation of the same finger) and the  
28 fusiform. Temporally, all responses showed good agreement, with beta, gamma, and fusiform evoked  
29 responses all exhibiting  $>80\%$  correlation. In addition, all responses at both sites were of comparable  
30 amplitude (the slight discrepancy in the beta rebound amplitude at the sensor level is likely due to  
31 sensor placement; this was largely rectified by source reconstruction).

32         A limitation of the SickKids site remains the ambient field. Even after dynamic nulling and HFC  
33 are applied, sources of interference remain due to the busy clinical environment and city centre  
34 infrastructure in which the system is located. Such interference, which is likely due to e.g., vibrations

1 in the MSR (for example, from a car driving underneath) led to a greater number of trials being  
2 rejected at the SickKids site, compared to the SPMIC site (particularly in the face processing paradigm).  
3 Despite this, the system is still fully operational, and a simple trial rejection algorithm was able to  
4 discard trials with high degrees of interference. In future installations, the use of an OPM-optimised  
5 magnetically shielded rooms, with the capability to demagnetise the inner mu-metal walls (using a  
6 degaussing system) will likely reduce these effects.

## 8 **CONCLUSION**

9 We have demonstrated that a commercial OPM-MEG system can be sited in a non-optimised  
10 shielded room, in a clinical setting, in a major city and yield data comparable to that collected in an  
11 optimised site. Through use of dynamic nulling and homogeneous field correction, this system exhibits  
12 low noise, and successfully records OPM-MEG data which are well matched to equivalent data  
13 collected using existing (“tried and tested”) OPM-MEG instrumentation. We stress that the system  
14 remains nascent technology; further work can be done on artefact rejection, with more sophisticated  
15 post-processing techniques being explored. In addition, both OPM systems will benefit from a larger  
16 sensor array, which will improve coverage of the brain, and increase the information available to  
17 algorithms like HFC and source localisation, which will further improve signal to noise ratio. Despite  
18 this, the paper shows that “plug-and-play” OPM-MEG systems now exist, they can be easily sited even  
19 in challenging environments, generate high fidelity data, and will provide significant benefit to clinical  
20 research groups who can now begin to exploit the high degrees of practicality and lifetime compliance  
21 which OPMs afford, to explore clinical questions.

## 23 **ACKNOWLEDGEMENTS**

24 We acknowledge support from the UK Quantum Technology Hub in Sensing and Timing, funded by  
25 EPSRC (EP/T001046/1). Sensor development was made possible by funding from the National  
26 Institutes of Health (R44MH110288). We also express thanks to Metamorphic AM and Added Scientific  
27 Ltd. for the useful and productive discussions that led to the design of the lightweight helmet used for  
28 paediatric measurements.

29 SickKids also acknowledges the following grants:

- 30 • Brain oscillations and emerging symptoms in toddlers with autism: Combined insights from  
31 new MEG technology and basic neurophysiology. . Safar, K., Anagnostou, E., Brian, J.,  
32 Collingridge, G., Taylor, M.J. Feiga Bresver Catalyst Grant. April 1, 2021 – March 31, 2023.
- 33 • It’s all about time: Optimising infrastructure for functional brain imaging in children. Taylor,  
34 M.J., Mabbott, D.J., Dunkley, B.T. CFI- JELF, 2018-2023,



1 **CONFLICTS OF INTEREST**

2 V.S. is the founding director of QuSpin, the commercial entity selling OPM magnetometers. J.O. is an  
3 employee of QuSpin. E.B. and M.J.B. are directors of Cerca Magnetics Limited, a spin-out company  
4 whose aim is to commercialise aspects of OPM-MEG technology. E.B., M.J.B., R.B., N.H. and R.H. hold  
5 founding equity in Cerca Magnetics Limited.

6  
7 **REFERENCES**

- 8 Alem, O., Benison, A. M., Barth, D. S., Kitching, J., & Knappe, S. (2014). Magnetoencephalography of  
9 Epilepsy with a Microfabricated Atomic Magnetode. *Journal of Neuroscience*, 34(43).  
10 <https://doi.org/10.1523/JNEUROSCI.3495-14.2014>
- 11 Alem, O., Mhaskar, R., Jiménez-Martínez, R., Sheng, D., LeBlanc, J., Trahms, L., Sander, T., Kitching, J.,  
12 & Knappe, S. (2017). Magnetic field imaging with microfabricated optically-pumped  
13 magnetometers. *Optics Express*, 25(7). <https://doi.org/10.1364/OE.25.007849>
- 14 Allred, J. C., Lyman, R. N., Kornack, T. W., & Romalis, M. v. (2002). High-Sensitivity Atomic  
15 Magnetometer Unaffected by Spin-Exchange Relaxation. *Physical Review Letters*, 89(13).  
16 <https://doi.org/10.1103/PhysRevLett.89.130801>
- 17 Altarev, I., Fierlinger, P., Lins, T., Marino, M. G., Nießen, B., Petzoldt, G., Reisner, M., Stuiber, S.,  
18 Sturm, M., Taggart Singh, J., Taubenheim, B., Rohrer, H. K., & Schläpfer, U. (2015). Minimizing  
19 magnetic fields for precision experiments. *Journal of Applied Physics*, 117(23).  
20 <https://doi.org/10.1063/1.4922671>
- 21 Baillet, S. (2017). Magnetoencephalography for brain electrophysiology and imaging. *Nature*  
22 *Neuroscience*, 20(3). <https://doi.org/10.1038/nn.4504>
- 23 Bentin, S., Allison, T., Puce, A., Perez, E., & McCarthy, G. (1996). Electrophysiological Studies of Face  
24 Perception in Humans. *Journal of Cognitive Neuroscience*, 8(6).  
25 <https://doi.org/10.1162/jocn.1996.8.6.551>
- 26 Borna, A., Carter, T. R., Goldberg, J. D., Colombo, A. P., Jau, Y.-Y., Berry, C., McKay, J., Stephen, J.,  
27 Weisend, M., & Schwindt, P. D. D. (2017). A 20-channel magnetoencephalography system  
28 based on optically pumped magnetometers. *Physics in Medicine & Biology*, 62(23).  
29 <https://doi.org/10.1088/1361-6560/aa93d1>
- 30 Boto, E., Bowtell, R., Krüger, P., Fromhold, T. M., Morris, P. G., Meyer, S. S., Barnes, G. R., & Brookes,  
31 M. J. (2016). On the Potential of a New Generation of Magnetometers for MEG: A Beamformer  
32 Simulation Study. *PLOS ONE*, 11(8). <https://doi.org/10.1371/journal.pone.0157655>
- 33 Boto, E., Holmes, N., Leggett, J., Roberts, G., Shah, V., Meyer, S. S., Muñoz, L. D., Mullinger, K. J.,  
34 Tierney, T. M., Bestmann, S., Barnes, G. R., Bowtell, R., & Brookes, M. J. (2018). Moving  
35 magnetoencephalography towards real-world applications with a wearable system. *Nature*,  
36 555(7698). <https://doi.org/10.1038/nature26147>
- 37 Boto, E., Meyer, S. S., Shah, V., Alem, O., Knappe, S., Kruger, P., Fromhold, T. M., Lim, M., Glover, P.  
38 M., Morris, P. G., Bowtell, R., Barnes, G. R., & Brookes, M. J. (2017). A new generation of  
39 magnetoencephalography: Room temperature measurements using optically-pumped  
40 magnetometers. *NeuroImage*, 149. <https://doi.org/10.1016/j.neuroimage.2017.01.034>

- 1 Cignoni, P., Callieri, M., Corsini, M., Dellepiane, M., Ganovelli, F., & Ranzuglia, G. (2008). MeshLab: an  
2 Open-Source Mesh Processing Tool. *Sixth Eurographics Italian Chapter Conference*, 129–136.
- 3 Cohen, D. (1972). Magnetoencephalography: Detection of the Brain's Electrical Activity with a  
4 Superconducting Magnetometer. *Science*, 175(4022).  
5 <https://doi.org/10.1126/science.175.4022.664>
- 6 Halgren, E. (2000). Cognitive Response Profile of the Human Fusiform Face Area as Determined by  
7 MEG. *Cerebral Cortex*, 10(1). <https://doi.org/10.1093/cercor/10.1.69>
- 8 Hämäläinen, M., Hari, R., Ilmoniemi, R. J., Knuutila, J., & Lounasmaa, O. v. (1993).  
9 Magnetoencephalography—theory, instrumentation, and applications to noninvasive studies  
10 of the working human brain. *Reviews of Modern Physics*, 65(2).  
11 <https://doi.org/10.1103/RevModPhys.65.413>
- 12 Hill, R. M., Boto, E., Holmes, N., Hartley, C., Seedat, Z. A., Leggett, J., Roberts, G., Shah, V., Tierney, T.  
13 M., Woolrich, M. W., Stagg, C. J., Barnes, G. R., Bowtell, R., Slater, R., & Brookes, M. J. (2019). A  
14 tool for functional brain imaging with lifespan compliance. *Nature Communications*, 10(1).  
15 <https://doi.org/10.1038/s41467-019-12486-x>
- 16 Hill, R. M., Boto, E., Rea, M., Holmes, N., Leggett, J., Coles, L. A., Papastavrou, M., Everton, S. K.,  
17 Hunt, B. A. E., Sims, D., Osborne, J., Shah, V., Bowtell, R., & Brookes, M. J. (2020). Multi-channel  
18 whole-head OPM-MEG: Helmet design and a comparison with a conventional system.  
19 *NeuroImage*, 219. <https://doi.org/10.1016/j.neuroimage.2020.116995>
- 20 Holmes, N., Leggett, J., Boto, E., Roberts, G., Hill, R. M., Tierney, T. M., Shah, V., Barnes, G. R.,  
21 Brookes, M. J., & Bowtell, R. (2018). A bi-planar coil system for nulling background magnetic  
22 fields in scalp mounted magnetoencephalography. *NeuroImage*, 181.  
23 <https://doi.org/10.1016/j.neuroimage.2018.07.028>
- 24 Holmes, N., Tierney, T. M., Leggett, J., Boto, E., Mellor, S., Roberts, G., Hill, R. M., Shah, V., Barnes, G.  
25 R., Brookes, M. J., & Bowtell, R. (2019). Balanced, bi-planar magnetic field and field gradient  
26 coils for field compensation in wearable magnetoencephalography. *Scientific Reports*, 9(1).  
27 <https://doi.org/10.1038/s41598-019-50697-w>
- 28 Hoogenboom, N., Schoffelen, J.-M., Oostenveld, R., Parkes, L. M., & Fries, P. (2006). Localizing  
29 human visual gamma-band activity in frequency, time and space. *NeuroImage*, 29(3).  
30 <https://doi.org/10.1016/j.neuroimage.2005.08.043>
- 31 Iivanainen, J., Stenroos, M., & Parkkonen, L. (2017). Measuring MEG closer to the brain:  
32 Performance of on-scalp sensor arrays. *NeuroImage*, 147.  
33 <https://doi.org/10.1016/j.neuroimage.2016.12.048>
- 34 Iivanainen, J., Zetter, R., & Parkkonen, L. (2020). Potential of on-scalp MEG: Robust detection of  
35 human visual gamma-band responses. *Human Brain Mapping*, 41(1).  
36 <https://doi.org/10.1002/hbm.24795>
- 37 Jaklevic, R. C., Lambe, J., Silver, A. H., & Mercereau, J. E. (1964). Quantum Interference Effects in  
38 Josephson Tunneling. *Physical Review Letters*, 12(7).  
39 <https://doi.org/10.1103/PhysRevLett.12.159>
- 40 Kominis, I. K., Kornack, T. W., Allred, J. C., & Romalis, M. v. (2003). A subfemtotesla multichannel  
41 atomic magnetometer. *Nature*, 422(6932). <https://doi.org/10.1038/nature01484>

- 1 Nolte, G. (2003). The magnetic lead field theorem in the quasi-static approximation and its use for  
2 magnetoencephalography forward calculation in realistic volume conductors. *Physics in*  
3 *Medicine and Biology*, 48(22). <https://doi.org/10.1088/0031-9155/48/22/002>
- 4 Oostenveld, R., Fries, P., Maris, E., & Schoffelen, J.-M. (2011). FieldTrip: Open Source Software for  
5 Advanced Analysis of MEG, EEG, and Invasive Electrophysiological Data. *Computational*  
6 *Intelligence and Neuroscience*, 2011. <https://doi.org/10.1155/2011/156869>
- 7 Rea, M., Holmes, N., Hill, R. M., Boto, E., Leggett, J., Edwards, L. J., Woolger, D., Dawson, E., Shah, V.,  
8 Osborne, J., Bowtell, R., & Brookes, M. J. (2021). Precision magnetic field modelling and control  
9 for wearable magnetoencephalography. *NeuroImage*, 241.  
10 <https://doi.org/10.1016/j.neuroimage.2021.118401>
- 11 Schwindt, P. D. D., Lindseth, B., Knappe, S., Shah, V., Kitching, J., & Liew, L.-A. (2007). Chip-scale  
12 atomic magnetometer with improved sensitivity by use of the Mx technique. *Applied Physics*  
13 *Letters*, 90(8). <https://doi.org/10.1063/1.2709532>
- 14 Taylor, M. J., George, N., & Ducorps, A. (2001). Magnetoencephalographic evidence of early  
15 processing of direction of gaze in humans. *Neuroscience Letters*, 316(3).  
16 [https://doi.org/10.1016/S0304-3940\(01\)02378-3](https://doi.org/10.1016/S0304-3940(01)02378-3)
- 17 Tierney, T. M., Alexander, N., Mellor, S., Holmes, N., Seymour, R., O'Neill, G. C., Maguire, E. A., &  
18 Barnes, G. R. (2021). Modelling optically pumped magnetometer interference in MEG as a  
19 spatially homogeneous magnetic field. *NeuroImage*, 244.  
20 <https://doi.org/10.1016/j.neuroimage.2021.118484>
- 21  
22  
23
